# Supplementary material for: Risk Factors for Cytomegalovirus Infection and Its Impact on Survival after Living Donor Liver Transplantation in South Korea: A Nested Case-Control Study
Source: MDPI journal article supplement (doi:10.3390/pathogens12040521), 2023-03-27
Supplement: s1 [file s1]

**Figure S1. Cumulative incidence of CMV infection within 12 months after LDLT.**

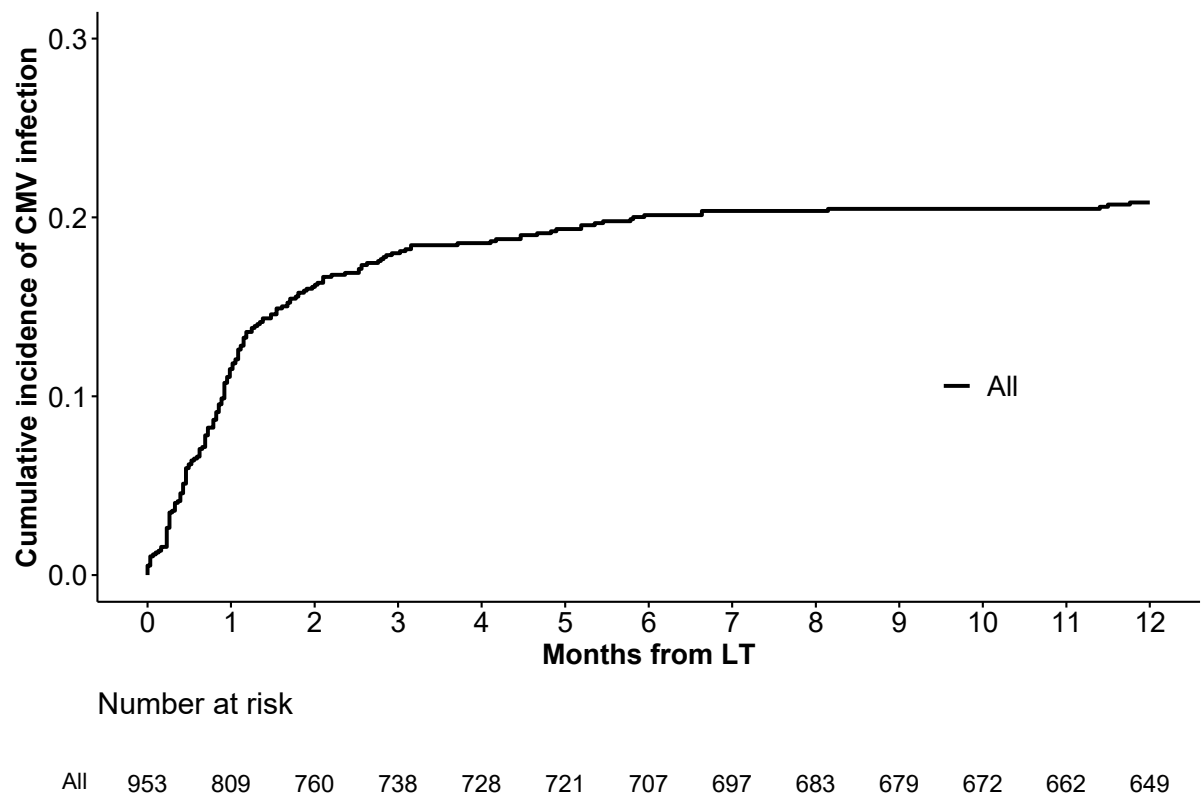

**Figure S2. Density plot for days from LDLT to CMV infection.**

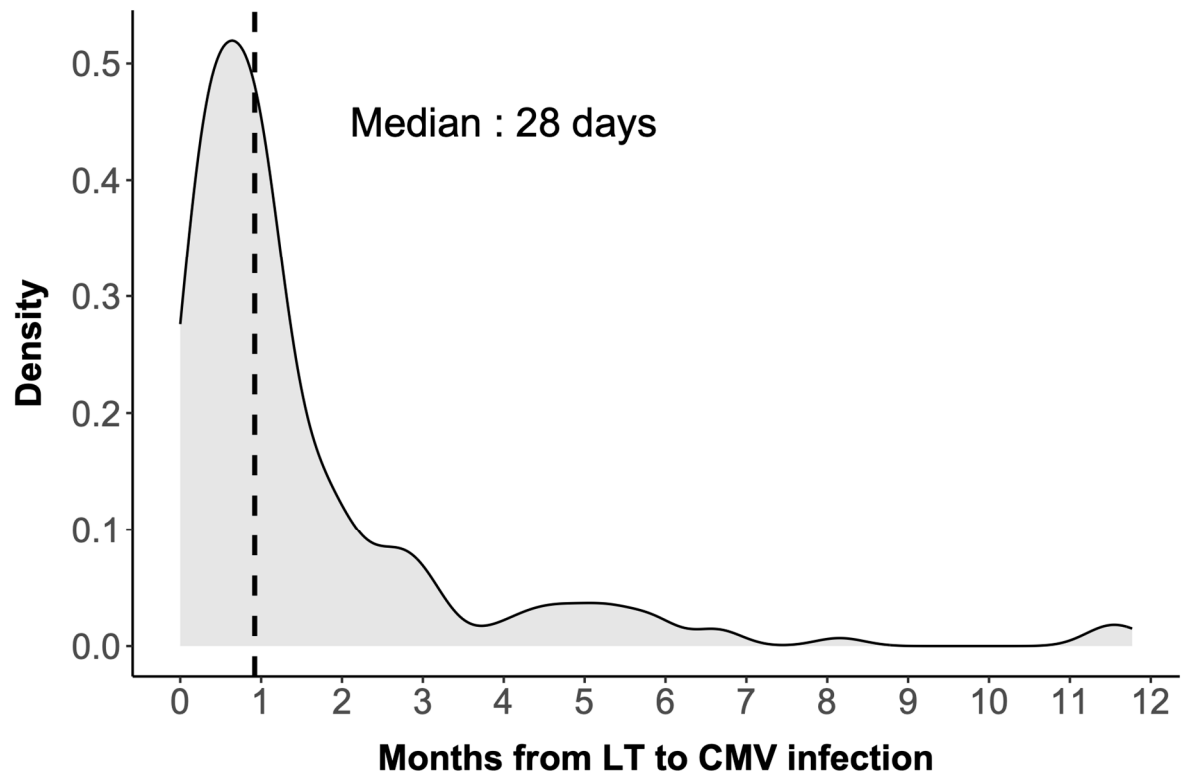

**Table S1. Uni- and multivariable Cox regression for graft survival**

| Variables                |           | HR (univariable)           | HR (multivariable)        |
|--------------------------|-----------|----------------------------|---------------------------|
| CMV_infection            | No        | -                          | -                         |
|                          | Yes       | 2.50 (1.58-3.95, p<0.001)  | 1.93 (1.16-3.20, p=0.012) |
| Age                      |           | 1.01 (0.98-1.03, p=0.662)  | -                         |
| Sex                      | Male      | -                          | -                         |
|                          | Female    | 1.37 (0.84-2.22, p=0.206)  | -                         |
| BMI                      |           | 0.97 (0.90-1.04, p=0.402)  | -                         |
| LT_year                  | 2012-2015 | -                          | -                         |
|                          | 2016-2018 | 1.05 (0.62-1.81, p=0.846)  | -                         |
|                          | 2019-2021 | 1.35 (0.66-2.75, p=0.417)  | -                         |
| Hypertension             | No        | -                          | -                         |
|                          | Yes       | 1.33 (0.79-2.25, p=0.281)  | -                         |
| Diabetes_mellitus        | No        | -                          | -                         |
|                          | Yes       | 1.58 (0.99-2.52, p=0.056)  | 1.33 (0.82-2.16, p=0.251) |
| Cardiovascular_disease   | No        | -                          | -                         |
|                          | Yes       | 1.85 (0.85-4.03, p=0.124)  | -                         |
| Underlying_liver_disease | Alcoholic | -                          | -                         |
|                          | Viral     | 0.97 (0.56-1.71, p=0.928)  | -                         |
|                          | Others    | 0.96 (0.46-1.97, p=0.906)  | -                         |
| HCC                      | No        | -                          | -                         |
|                          | Yes       | 0.88 (0.55-1.39, p=0.572)  | -                         |
| Pretransplant_MELD       |           | 1.04 (1.02-1.07, p=0.002)  | 1.02 (0.99-1.06, p=0.240) |
| Pretransplant_stay       | OPD       | -                          | -                         |
|                          | Ward      | 1.79 (1.12-2.85, p=0.015)  | 1.63 (0.99-2.67, p=0.055) |
|                          | ICU       | 3.42 (0.82-14.19, p=0.090) | 1.48 (0.33-6.70, p=0.613) |
| Refractory_ascites       | No        | -                          | -                         |
|                          | Yes       | 1.33 (0.64-2.77, p=0.449)  | -                         |
| Encephalopathy           | No        | -                          | -                         |
|                          | Yes       | 1.04 (0.53-2.02, p=0.919)  | -                         |
| ABO_incompatibility      | No        | -                          | -                         |
|                          | Yes       | 1.32 (0.80-2.18, p=0.272)  | -                         |
| Donor_age                |           | 1.02 (1.00-1.04, p=0.038)  | 1.02 (1.00-1.04, p=0.108) |
| Donor_sex                | Male      | -                          | -                         |
|                          | Female    | 1.20 (0.75-1.92, p=0.440)  | -                         |
| Donor_BMI                |           | 1.04 (0.94-1.14, p=0.464)  | -                         |
| Macrovesicular_steatosis | <10%      | -                          | -                         |
|                          | >=10%     | 1.01 (0.56-1.84, p=0.968)  | -                         |
| OP_time                  |           | 1.00 (1.00-1.00, p=0.001)  | 1.00 (1.00-1.01, p=0.002) |
| Transfusion_RBC          |           | 1.03 (1.01-1.05, p=0.007)  | 0.99 (0.95-1.03, p=0.595) |
| Reoperation              | No        | -                          | -                         |
|                          | Yes       | 1.75 (0.84-3.65, p=0.136)  | -                         |
| cr_preLT                 |           | 1.21 (0.98-1.49, p=0.081)  | 1.10 (0.81-1.50, p=0.542) |
| albumin_preLT            |           | 1.44 (0.96-2.15, p=0.075)  | 3.08 (1.80-5.27, p<0.001) |
| glucose_preLT            |           | 1.00 (0.99-1.00, p=0.595)  | -                         |
| hb_preLT                 |           | 0.84 (0.75-0.94, p=0.003)  | 0.78 (0.67-0.90, p=0.001) |
| plt_preLT                |           | 1.00 (0.99-1.00, p=0.541)  | -                         |
| wbc_preLT                |           | 1.01 (0.92-1.10, p=0.844)  | -                         |
| neutro_preLT             |           | 1.01 (0.92-1.12, p=0.788)  | -                         |
| lympho_preLT             |           | 0.62 (0.36-1.07, p=0.086)  | 0.76 (0.45-1.30, p=0.320) |
| TAC_mean                 |           | 1.04 (0.98-1.11, p=0.225)  | -                         |
| TAC_max                  |           | 1.03 (1.00-1.06, p=0.091)  | 1.02 (0.99-1.06, p=0.160) |
| MMF_use                  | No        | -                          | -                         |
|                          | Yes       | 0.92 (0.57-1.47, p=0.725)  | -                         |
| mTORi_use                | No        | -                          | -                         |
|                          | Yes       | 1.08 (0.50-2.36, p=0.847)  | -                         |

|             |     |                           |   |
|-------------|-----|---------------------------|---|
| Steroid_use | No  | -                         | - |
|             | Yes | 1.12 (0.35-3.56, p=0.846) | - |

**Table S2. Full results of univariable logistic regression for CMV infection**

| Variables                                | OR (95% CI)         | P     |
|------------------------------------------|---------------------|-------|
| Age                                      | 0.98 (0.95-1.00)    | 0.084 |
| Sex, female                              | 2.31 (1.46-3.67)    | 0.001 |
| BMI                                      | 0.96 (0.89-1.02)    | 0.187 |
| Year of LT (2012-2015)                   |                     |       |
| 2016-2018                                | 1.00 (0.60-1.67)    | 1.000 |
| 2019-2021                                | 1.00 (0.53-1.89)    | 1.000 |
| Hypertension                             | 1.28 (0.77-2.13)    | 0.333 |
| Diabetes mellitus                        | 1.04 (0.66-1.62)    | 0.877 |
| Cardiovascular disease                   | 1.63 (0.70-3.68)    | 0.246 |
| Pretransplant MELD                       | 1.09 (1.06-1.12)    | 0.001 |
| Pretransplant stay (out-patient day)     |                     |       |
| Ward                                     | 2.15 (1.38-3.36)    | 0.001 |
| Intensive care unit                      | 10.97 (1.59-216.69) | 0.034 |
| Refractory ascites                       | 0.78 (0.35-1.64)    | 0.532 |
| Severe encephalopathy                    | 2.16 (1.20-3.90)    | 0.010 |
| ABO incompatibility                      | 1.83 (1.14-2.92)    | 0.012 |
| Donor age                                | 1.01 (0.99-1.03)    | 0.470 |
| Donor sex, female                        | 0.84 (0.54-1.31)    | 0.453 |
| Donor BMI                                | 1.01 (0.92-1.10)    | 0.875 |
| Macrovesicular steatosis ( $\geq 10\%$ ) | 1.70 (1.00-2.90)    | 0.050 |
| Operation time, min                      | 1.00 (1.00-1.00)    | 0.535 |
| Transfusion of RBC, pack                 | 1.03 (1.00-1.07)    | 0.043 |
| History of re-operation after LT         | 2.14 (1.03-4.47)    | 0.040 |
| Creatinine, mg/dL                        | 1.71 (1.16-2.78)    | 0.017 |
| Albumin, g/dL                            | 0.86 (0.59-1.26)    | 0.448 |
| Glucose, mg/dL                           | 1.00 (1.00-1.01)    | 0.077 |
| Hemoglobin, g/dL                         | 0.92 (0.83-1.01)    | 0.093 |
| Platelet, $10^3/\mu\text{L}$             | 1.00 (1.00-1.00)    | 0.936 |
| White blood cell, $10^3/\mu\text{L}$     | 1.18 (1.09-1.29)    | 0.001 |
| Neutrophil, $10^3/\mu\text{L}$           | 1.24 (1.13-1.38)    | 0.001 |
| Lymphocyte, $10^3/\mu\text{L}$           | 0.76 (0.48-1.16)    | 0.212 |
| Mean TAC trough level, ng/dL             | 1.01 (0.94-1.08)    | 0.817 |
| Maximum TAC trough level, ng/dL          | 1.01 (0.98-1.05)    | 0.397 |
| Use of immunosuppressants                |                     |       |

|                          |                   |       |
|--------------------------|-------------------|-------|
| TAC                      | 2.02 (0.29-39.65) | 0.533 |
| Mycophenolate mofetil    | 0.98 (0.63-1.54)  | 0.940 |
| mTOR inhibitor           | 0.78 (0.35-1.64)  | 0.532 |
| Steroid                  | 1.00 (0.38-2.93)  | 1.000 |
| Acute cellular rejection | 1.02 (0.63-1.64)  | 0.935 |

---
